## RESEARCH ARTICLE

# Feeling the heat: variation in thermal sensitivity within and among populations

Amanda N. DeLiberto\*, Melissa K. Drown, Moritz A. Ehrlich, Marjorie F. Oleksiak and Douglas L. Crawford

## ABSTRACT

Physiology defines individual responses to global climate change and species distributions across environments. Physiological responses are driven by temperature on three time scales: acute, acclimatory and evolutionary. Acutely, passive temperature effects often dictate an expected 2-fold increase in metabolic processes for every 10°C change in temperature ( $Q_{10}$ ). Yet, these acute responses often are mitigated through acclimation within an individual or evolutionary adaptation within populations over time. Natural selection can influence both responses and often reduces interindividual variation towards an optimum. However, this interindividual physiological variation is not well characterized. Here, we quantified responses to a 16°C temperature difference in six physiological traits across nine thermally distinct *Fundulus heteroclitus* populations. These traits included whole-animal metabolism (WAM), critical thermal maximum ( $CT_{max}$ ) and substrate-specific cardiac metabolism measured in approximately 350 individuals. These traits exhibited high variation among both individuals and populations. Thermal sensitivity ( $Q_{10}$ ) was determined, specifically as the acclimated  $Q_{10}$ , in which individuals were both acclimated and assayed at each temperature. The interindividual variation in  $Q_{10}$  was unexpectedly large: ranging from 0.6 to 5.4 for WAM. Thus, with a 16°C difference, metabolic rates were unchanged in some individuals, while in others they were 15-fold higher. Furthermore, a significant portion of variation was related to habitat temperature. Warmer populations had a significantly lower  $Q_{10}$  for WAM and  $CT_{max}$  after acclimation. These data suggest that individual variation in thermal sensitivity reflects different physiological strategies to respond to temperature variation, providing many different adaptive responses to changing environments.

**KEY WORDS:** *Fundulus heteroclitus*, Metabolism,  $CT_{max}$ , Acclimation, Thermal tolerance,  $Q_{10}$

## INTRODUCTION

Climate change impacts all levels of biological organization, from enzymatic processes to ecological interactions, and the ability of individual species to continue to thrive is often linked to thermal physiological performance (Chown et al., 2010; Deutsch et al., 2015, 2020; Pörtner and Farrell, 2008; Somero, 2012; Sunday et al., 2012). Yet, we lack a thorough understanding of physiological performance variation among individuals and populations that may allow them to withstand increasing temperatures. Variation in thermal physiology is due to both plastic and heritable responses on

three time scales: (1) acute – an immediate response without active physiological mitigation; (2) acclimatory – a time-dependent response mitigating the acute response; and (3) adaptive – a population response where there is selection for individuals that are less affected by temperature changes. At an individual level, the response to temperature is described as thermal sensitivity or  $Q_{10}$ : the reaction rate fold-change of a physiological trait for every 10°C temperature change (Hochachka and Somero, 2002). This may include differences in acute temperature response, where an individual is acclimated to a single temperature and acutely exposed (acute  $Q_{10}$ ), or differences in temperature response when individuals are acclimated and assayed at each temperature (acclimated  $Q_{10}$ ) (Havird et al., 2020). Thus, biochemical reaction rates result in an expected acute  $Q_{10}$  response of 2 (Hochachka and Somero, 2002); however, physiological acclimation or evolutionary adaptation can change this  $Q_{10}$  response, either mitigating the acute effects to maintain homeostasis or intensifying it (Bullock, 1955; Gerken et al., 2015; Klein and Prosser, 1985; Leroi et al., 1994; Sokolova and Pörtner, 2003). Overall, these adaptations, involving both biochemical modifications and physiological processes driving acclimation, render populations more fit for their local thermal environments (Crawford and Powers, 1989; Crawford et al., 2020; Eanes, 1999; Graves and Somero, 1982; Hochachka and Somero, 2002; Powers et al., 1993; Somero, 1995). Thus, in general, ectotherms often evolve mechanisms to maintain similar physiological traits among different thermal environments (Addo-Bediako et al., 2002; Conover and Present, 1990; Conover and Schultz, 1995; Crawford et al., 2020; Dayan et al., 2015; Hochachka and Somero, 2002; Pierce and Crawford, 1997b; Schulte, 2015; Somero, 1978).

Common temperature adaptations to mitigate acute temperature effects suggest strong selection that should reduce interindividual variation within populations. Yet, partitioning the variation within and among populations is challenging, requiring many individuals in several populations with studies that take into account all three response time scales (Havird et al., 2020). Without these data, it is unclear whether individuals have similar thermal sensitivity with little interindividual variation or whether multiple physiological responses drive individual variation in thermal sensitivity. While thermal sensitivity variation in some invertebrates has been observed (Leiva et al., 2018; Nespolo et al., 2003), few studies have examined how it varies among individuals and populations or whether thermal sensitivity is consistent across physiological traits (although see Drown et al., 2021). To examine the variation in thermal sensitivity, we examined three questions: (1) does thermal sensitivity vary among individuals within populations?; (2) is interindividual variation in thermal sensitivity shared across traits?; and (3) does thermal sensitivity vary among populations from different habitat temperatures?

To address these questions, we quantified six physiological traits in *Fundulus heteroclitus* acclimated and measured at 12 and 28°C.

Department of Marine Biology and Ecology, Rosenstiel School of Marine, Atmospheric, and Earth Science, University of Miami, Miami, FL 33149-1031, USA.

\*Author for correspondence (axd1320@miami.edu)

 A.N.D., 0000-0001-7055-8091; M.K.D., 0000-0002-7350-984X

Received 2 August 2022; Accepted 21 October 2022

*Fundulus heteroclitus* is a small estuarine teleost fish, widely distributed along the North American east coast (Burnett et al., 2007). The intertidal salt marshes where these fish reside have large daily temperature, salinity and oxygen fluctuations, contributing to *F. heteroclitus*' exceptional physiological plasticity and tolerance (Burnett et al., 2007; Crawford et al., 2020; Smith and Able, 2003). Their wide geographic range and tolerance have made this species a model for examining temperature-driven physiological, biochemical and genetic divergence (Burnett et al., 2007; Crawford et al., 2020). Several studies have previously examined temperature adaptation between extreme northern (e.g. Maine, USA) and southern (e.g. Georgia, USA) *F. heteroclitus* populations. These population extremes exhibit metabolic and thermal tolerance differences (Fangue et al., 2006, 2009a,b; Healy and Schulte, 2012a, 2019; Healy et al., 2018; Oleksiak et al., 2005; Pierce and Crawford, 1997a; Podrabsky et al., 2000). Yet, there is little information on the interindividual variation in thermal sensitivity within and among populations.

Here, we examined thermal sensitivity within and among *F. heteroclitus* populations using 350 individuals collected from nine populations from New Jersey to Maine, USA that experience up to a 14.9°C difference in habitat temperature (Fig. 1, Table S1). These

populations were chosen because of their non-clinal temperature variation, such that geographically close populations have 2.5–4.4°C habitat temperature differences. To examine whether thermal sensitivity is shared among physiological traits, we measured six traits that are likely evolving in response to local environmental temperature (Burton et al., 2011; Healy and Schulte, 2012a; Oleksiak et al., 2005; Pörtner, 2012; Schulte, 2015): whole-animal metabolic rate (WAM); critical thermal maximum ( $CT_{max}$ ); and substrate-specific cardiac metabolism (CM) for glucose, fatty acid (FA), lactate–ketone–ethanol (LKA) and endogenous substrates. Thermal sensitivity was measured as acclimated  $Q_{10}$ , such that individuals were acclimated and measured at each temperature. Two of these traits, WAM and  $CT_{max}$ , were measured in each individual at 12 and 28°C. Four other traits, substrate-specific CM for glucose, FA, LKA and endogenous substrates, were terminal determinations and thus measured at either 12 or 28°C. This comprehensive dataset allowed us to investigate the temperature response due to both physiological acclimation and evolved differences among populations. We found that the traits covaried with habitat temperature, and this covariation was dependent on acclimation temperature. We also found very large thermal sensitivity variation with almost 10-fold differences among

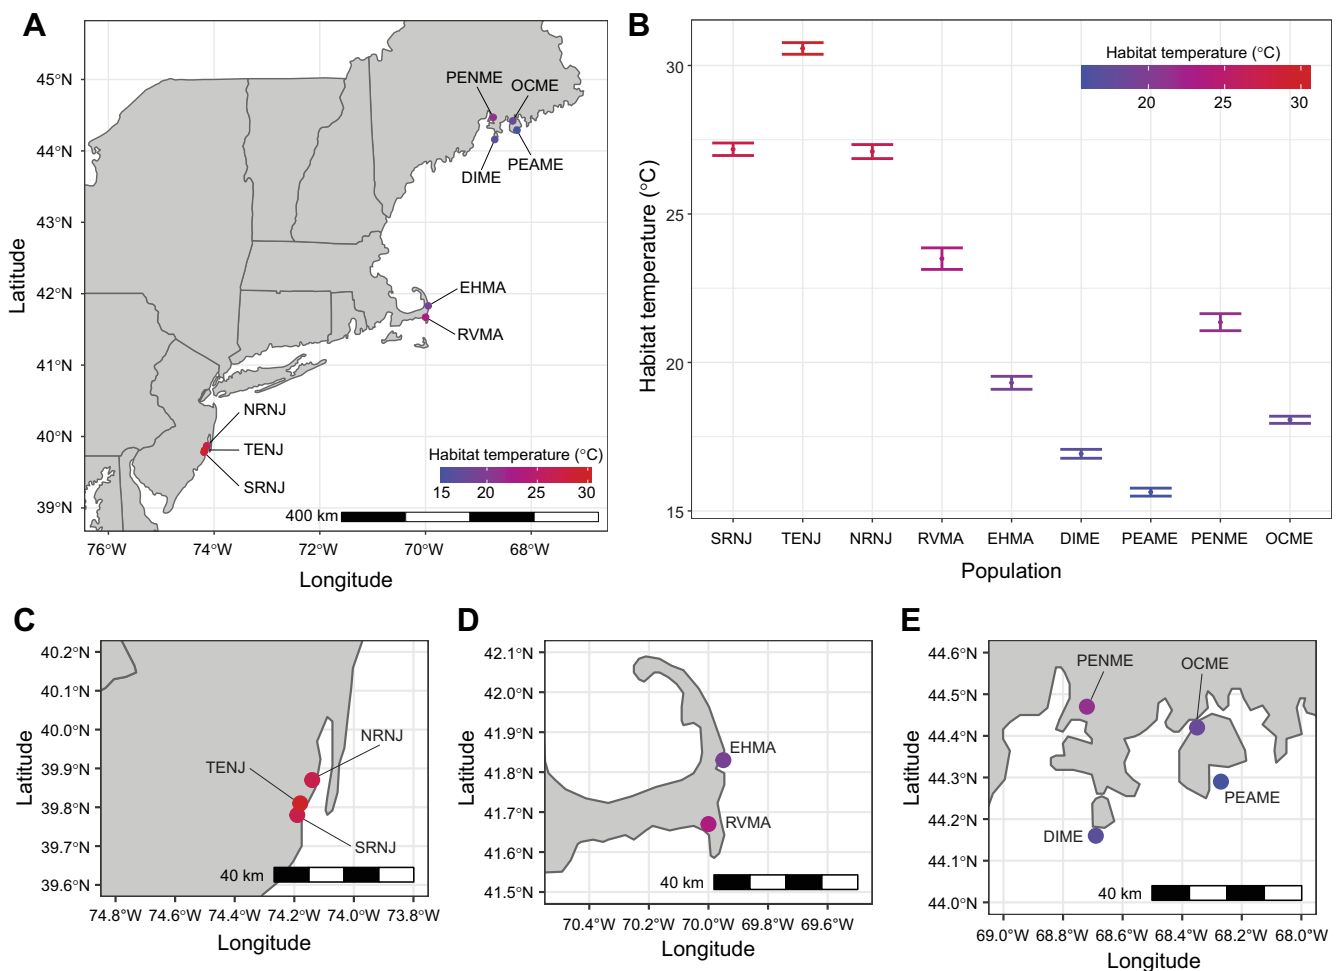

**Fig. 1. Temperature data and map of sites.** (A) Map of nine sites distributed along the northeastern coast of the USA. Points are colored by habitat temperature (°C) and denoted by population name (see Table S1 for detailed coordinates). (B) Mean minimum temperatures from HOB0 data collected in August 2018. (C–E) Individual maps per state for (C) NJ, (D) MA and (E) ME, displaying the site locations colored by habitat temperature, coordinated with the map in A, in order from south to north. All sites had significantly different mean minimum high tide temperatures ( $P < 0.05$ , one-way ANOVA with Tukey's HSD *post hoc* analysis), except SRNJ and NRNJ. Population details can be found in Table S1.

individuals and significant differences in  $Q_{10}$  related to habitat temperature.

## MATERIALS AND METHODS

### Population and temperature data collection

Adult *Fundulus heteroclitus* (Linnaeus 1766) were collected in September 2018 from nine populations using minnow traps and totaled over 350 individuals from New Jersey (NJ), Massachusetts (MA) and Maine (ME). These sites had significant temperature differences despite their geographic proximity (Fig. 1 Table S1). NJ sites included two reference populations surrounding a site impacted by the thermal effluence from a nuclear power station, reported in a previous publication examining physiological variation between these thermal effluence and reference sites (Drown et al., 2021). Raw data from the temperature and physiological measurements from that study were reanalyzed here with data from six other sites to assess physiological and acclimation differences across a wider temperature range. All fish were tagged with unique visual implant elastomer (VIE) tags for identification throughout the study.

HOBO data loggers collected temperature data throughout August 2018. To ensure HOBO data loggers were accurately collecting temperature data in the species' habitat, loggers were submerged in the shallow marsh. However, as a result of tidal fluctuations, loggers were occasionally exposed at low tide, such that they were recording air temperature, rather than water temperature; thus, only high-tide temperature data were used. Additionally, high tide is typically when most fish are present in the marsh, and move in with the tide (Butner and Brattstrom, 1960). The minimum temperature coinciding with daily high tide time was identified using HOBOWare software and then averaged across the collection period. These data were used to determine the mean temperature per location, which was analyzed by one-way ANOVA to determine thermal differences between locations.

### Animal care and acclimation regimes

All individuals were acclimated to 20°C and 15 ppt salinity for 3 months (12 h:12 h light:dark cycle), a 10°C 'winter' period for 6 weeks (8 h:16 h light:dark cycle), then to their experimental acclimation temperature at either 12 or 28°C (16 h:8 h light:dark cycle) for at least 6 weeks prior to physiological determinations. Following initial measurements, fish originally acclimated to 12°C were acclimated to 28°C and vice versa for at least 4 weeks. All fish were fed once daily to satiation (Otohime EP-1 feed) and were housed in recirculating aquaria (density of less than one fish per

liter) at 15 ppt salinity. Aquaria were maintained by de-nitrifying biofilter with weekly water exchanges. Fish were fasted 24 h prior to all physiological determinations. Handling and measurement procedures were approved by the Institutional Animal Care and Use Committee guidelines (Animal Use Protocol No: 16-127-adm04).

### Physiological traits

Following the initial acclimation, WAM was measured for each individual at their acclimation temperature. After a 1 week recovery period,  $CT_{max}$  was measured. After measurement at the initial acclimation temperature, fish were acclimated to the alternative temperature, and WAM and  $CT_{max}$  were measured again at the second temperature. Thus, both WAM and  $CT_{max}$  were determined at both 12 and 28°C for each individual. After a minimum 1 week recovery period post- $CT_{max}$ , fish were killed and substrate-specific CM was measured at the second acclimation temperature. Because of (limited) mortality and/or technical issues (i.e. sensor malfunction or failure during metabolic data collection), sample sizes varied somewhat between measurements. Full sample size data per trait and temperature can be found in Table 1.

### WAM

WAM was measured with a custom high-throughput intermittent flow respirometer. This respirometer measures 20 individuals per night, alternating flush and measurements over approximately 12 h as in Drown et al. (2020). Briefly, fish were placed in individual 0.30 l glass chambers. Chambers were then closed off, and oxygen concentration was monitored to measure organismal oxygen consumption rates. Following a 6 or 12 min measurement period, for 28 and 12°C, respectively, chambers were flushed to bring oxygen levels back to 100% saturation. These measurement-flush cycles were repeated continually overnight. The final oxygen consumption rate was determined as the lowest tenth percentile value of a distribution of all measurements throughout the night to estimate metabolic rate (Drown et al., 2020).

### $CT_{max}$

$CT_{max}$  was measured as a proxy for maximum thermal tolerance. Ten fish per measurement were placed in a 10 gallon (~38 l) glass aquarium with 15 ppt seawater starting at their acclimation temperature (12 or 28°C). A metal heating rod and circulating pump were placed in the aquarium to heat the water at a constant rate of 0.3°C min<sup>-1</sup> as in previous studies with *F. heteroclitus* (Bulger, 1984; Bulger and Tremaine, 1985; Fanguie et al., 2006), and an NST

**Table 1. Summary of physiological trait means and variance**

| Trait         | Temperature (°C) | N   | Mean±s.e.m.  | Variance | Equal variance P-value | Coefficient of variation |
|---------------|------------------|-----|--------------|----------|------------------------|--------------------------|
| WAM           | 12               | 256 | 1.792±0.040  | 0.412    | 1.595E-44              | 35.799                   |
| WAM           | 28               | 290 | 4.985±0.0945 | 2.592    |                        | 32.395                   |
| $CT_{max}$    | 12               | 350 | 35.367±0.066 | 1.674    | 0.000                  | 3.486                    |
| $CT_{max}$    | 28               | 334 | 41.787±0.029 | 0.303    |                        | 1.267                    |
| CM glucose    | 12               | 170 | 34.784±0.715 | 86.874   | 0.177                  | 26.796                   |
| CM glucose    | 28               | 153 | 45.381±0.838 | 107.512  |                        | 22.848                   |
| CM FA         | 12               | 146 | 25.875±1.008 | 148.473  | 8.197E-09              | 47.092                   |
| CM FA         | 28               | 149 | 31.264±0.614 | 56.247   |                        | 23.989                   |
| CM LKA        | 12               | 168 | 23.853±0.406 | 27.762   | 4.164E-09              | 22.090                   |
| CM LKA        | 28               | 151 | 25.048±0.688 | 71.445   |                        | 33.745                   |
| CM endogenous | 12               | 164 | 22.175±0.622 | 63.486   | 0.537                  | 35.931                   |
| CM endogenous | 28               | 141 | 18.627±0.638 | 57.356   |                        | 40.657                   |

Mass-corrected traits are denoted as follows: WAM, whole-animal metabolism (mg O<sub>2</sub> h<sup>-1</sup>),  $CT_{max}$ , critical thermal maximum (°C); CM, cardiac metabolism (pmol O<sub>2</sub> s<sup>-1</sup>). Variance between 12 and 28°C trait values was tested by *F*-test.

thermometer was placed in the tank to accurately monitor temperature. The 0.3°C change is similar to changes that naturally occur in marsh estuaries with an 8°C change in 1 h (Bulger, 1984). An air stone was placed in the water to maintain normoxic conditions.  $CT_{max}$  was recorded as the temperature at which fish lost equilibrium and no longer exhibited an escape response for five continuous seconds.

### CM

CM was measured at each acclimation temperature as oxygen consumed by heart ventricles over time as in DeLiberto et al. (2020 preprint). Briefly, fish were killed by cervical dislocation, and ventricles were removed and immediately placed in Ringer's glucose heparin solution. Ventricular oxygen consumption rates were measured in individual chambers inside a temperature-controlled water bath through a fluorometric oxygen sensor spot and fiber optical cable connected to an oxygen meter (PreSens). Metabolism was measured using four substrate conditions: (1) 5 mmol l<sup>-1</sup> glucose, (2) 1 mmol l<sup>-1</sup> palmitic acid bound to BSA (FA), (3) 5 mmol l<sup>-1</sup> lactate, 5 mmol l<sup>-1</sup> hydroxybutyrate (ketones) and 0.1% ethanol (LKA), and (4) no metabolic substrate (endogenous) (Oleksiak et al., 2005). Glycolytic enzyme inhibitors (10 mmol l<sup>-1</sup> iodoacetate and 20 mmol l<sup>-1</sup> 2-deoxyglucose) were added to all but glucose substrates to inhibit any background glycolytic metabolism. Each ventricle was measured in all four substrates, rotated among the four chambers, in the above order for a total of 6 min. Metabolic rate was taken as the slope of oxygen consumption over time for the final 3 min of measurement. Any background flux, measured before and after each run, was subtracted from final measurements.

### Statistical analysis

Statistical analyses were conducted using R version 4.1.0 (<http://www.R-project.org/>) and RStudio version 1.4.1717

(<https://www.rstudio.com/products/rstudio/>). An accompanying script detailing the analysis is available from GitHub ([https://github.com/ADeLiberto/Fundulus\\_Physiology](https://github.com/ADeLiberto/Fundulus_Physiology)). To understand the relationship between habitat temperature and physiological traits, variance due to mass was removed by using the residuals from a log linear (WAM) or linear regression ( $CT_{max}$  and CM) of the trait and mass, at each acclimation temperature. For CM, residuals were calculated both for body mass and heart mass, at each temperature and substrate combination. Additionally, to account for trait variance due to other variables, a forward and backward stepwise Akaike's information criterion (AIC) was used to determine the best-fit model for  $CT_{max}$  and WAM (Hurvich et al., 1998). To test equal variance between traits measured at 12°C versus 28°C, an *F*-test of variance was used. To represent acclimation response and calculate  $Q_{10}$ , mass residuals were transformed back into trait units. Assuming a fish based on the average mass across each dataset, a constant was calculated using the linear regression from mass. This constant was then added to the residuals. Thermal sensitivity ( $Q_{10}$ ) was calculated using these mass-corrected trait values. Of note, here we use thermal sensitivity specifically for the acclimated  $Q_{10}$ , in which individuals were both acclimated and assayed at each temperature. For WAM and  $CT_{max}$ ,  $Q_{10}$  was calculated per individual measured at both temperatures. For CM, as an individual was only measured at one temperature, the mean  $Q_{10}$  per population at 12 and 28°C was used to calculate the substrate-specific  $Q_{10}$ . Additionally, correlations among traits were examined using a Pearson's partial correlation analysis per temperature using mass residuals (WAM and  $CT_{max}$ ) and heart mass residuals (CM) at each temperature.

## RESULTS

### Acclimation responses in physiological traits

Metabolic measurements (WAM and CM) were assayed at the acclimation temperature (12 or 28°C); thus, assay temperatures

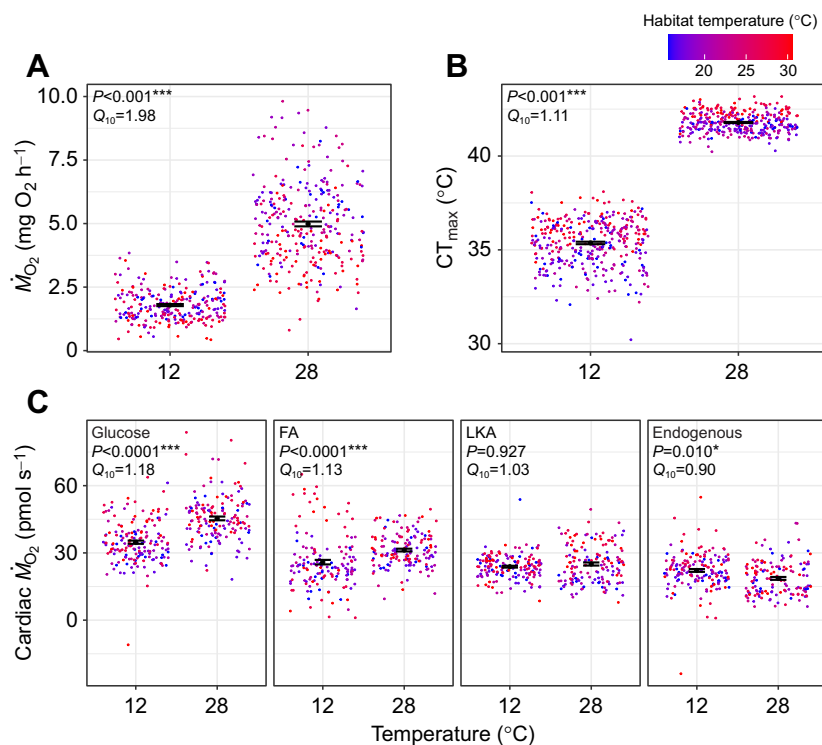

**Fig. 2. Physiological traits of *Fundulus heteroclitus* at 12 and 28°C.** Physiological traits for fish acclimated and measured at 12 and 28°C for (A) whole-animal metabolism (WAM, calculated as  $\dot{M}_{O_2}$ ); (B) critical thermal maximum ( $CT_{max}$ ); and (C) substrate-specific cardiac metabolism (CM) with glucose, fatty acid (FA), lactate–ketone–ethanol (LKA) and endogenous substrates. All values were mass corrected, using body mass for WAM and  $CT_{max}$ , and heart mass for CM. Black points and bars represent the mean  $\pm$  s.e.m. for 12 and 28°C acclimation and measurement temperatures. All individuals are plotted for each trait and colored by habitat temperature (coldest, blue; warmest, red). Temperature effects for WAM and  $CT_{max}$  were tested by *t*-test. Relationships for substrate- and temperature-specific effects in CM were tested by two-way ANOVA and Tukey HSD *post hoc* analysis. Asterisks indicate significant *P*-values: \**P* < 0.05, \*\*\**P* < 0.001.

differed by 16°C.  $CT_{max}$  was an acute determination in response to warming temperature ( $0.3^{\circ}\text{C min}^{-1}$ ), starting at the acclimation temperature. The same individuals were acclimated and measured at both temperatures for WAM and  $CT_{max}$ , allowing us to investigate individual thermal sensitivity (as acclimated  $Q_{10}$ ) in these traits. As mass significantly affected all traits (Table S2), all trait comparisons include body mass (WAM and  $CT_{max}$ ) or heart mass (CM) as a covariate to remove interindividual trait variation due to mass. Body mass and heart mass were significantly correlated at both temperatures with an  $R^2$  of 0.453 and 0.662 for 12 and 28°C, respectively (Fig. S1A). Interestingly, while body mass was not significantly different between the two acclimation temperatures (Fig. S1C), heart mass was ~25% greater at 12°C than at 28°C ( $P<0.001$ , Fig. S1B).

Based on a 16°C increase in temperature, an expected  $Q_{10}$  of 2.0 should result in a 3.0-fold increase in WAM and  $CT_{max}$  at 28°C relative to 12°C. Among all individuals, WAM was significantly greater, by approximately 2.8-fold, at 28°C than at 12°C ( $Q_{10}=1.98$ ; Fig. 2A), similar to the expected  $Q_{10}$  of 2.0. Yet, there was high WAM variation among individuals, with greater variance at 28°C than at 12°C ( $F$ -test,  $P<0.001$ ; Fig. 2A, Table 1). At 28°C,  $CT_{max}$  was also significantly greater (1.2-fold) than at 12°C ( $F$ -test,  $P<0.001$ ,  $Q_{10}=1.11$ ; Fig. 2B), but variance was significantly higher at 12°C than at 28°C ( $P<0.001$ ; Table 1). For CM, all substrates except for LKA displayed significant temperature responses (Fig. 2C). Glucose and FA metabolic rates were greater at 28°C ( $P<0.001$ ; Fig. 2C); however, endogenous metabolism was lower at 28°C ( $P=0.01$ ; Fig. 2C).

### Trait variance and habitat temperature

Mean minimum high tide temperatures were significantly different between all populations except the two NJ reference populations (NRNJ and SRNJ) surrounding the site heated by nuclear power plant thermal effluence (TENJ; Fig. 1B). Local populations distributed over less than 20 km experienced up to 4.4°C temperature differences, and across all populations there was up to a 14.9°C difference in habitat temperatures.

For WAM, at 12°C, habitat temperature did not influence metabolic rate among these nine populations ( $P=0.848$ ; Fig. 3A); in contrast, at 28°C, metabolism negatively regressed with habitat temperature, such that colder populations had a higher metabolic rate ( $P<0.001$ ; Fig. 3A). To examine additional covariates, the relationship between habitat temperature and metabolic rate was also assessed using an Akaike's information criterion (AIC) best-fit model. The input AIC model incorporated acclimation order (12 to 28°C or 28 to 12°C), acclimation temperature, mass and interactions between them (full best-fit model in Fig. S2A, Table S2). Although acclimation order significantly impacted WAM, including these additional covariates did not alter our conclusions with respect to habitat temperature effects on WAM. Interestingly, for 12°C acclimation, all populations had a higher metabolic rate in the 12 to 28°C acclimation order group (Fig. S2A). This difference was not as prominent at 28°C; however, the coldest populations (PEAME/DIME) had a higher  $\dot{M}_{O_2}$  when acclimated to 12°C first compared with the group acclimated to 28°C first.

$CT_{max}$  positively regressed with habitat temperature at both 12 and 28°C, such that  $CT_{max}$  was greater for warmer populations

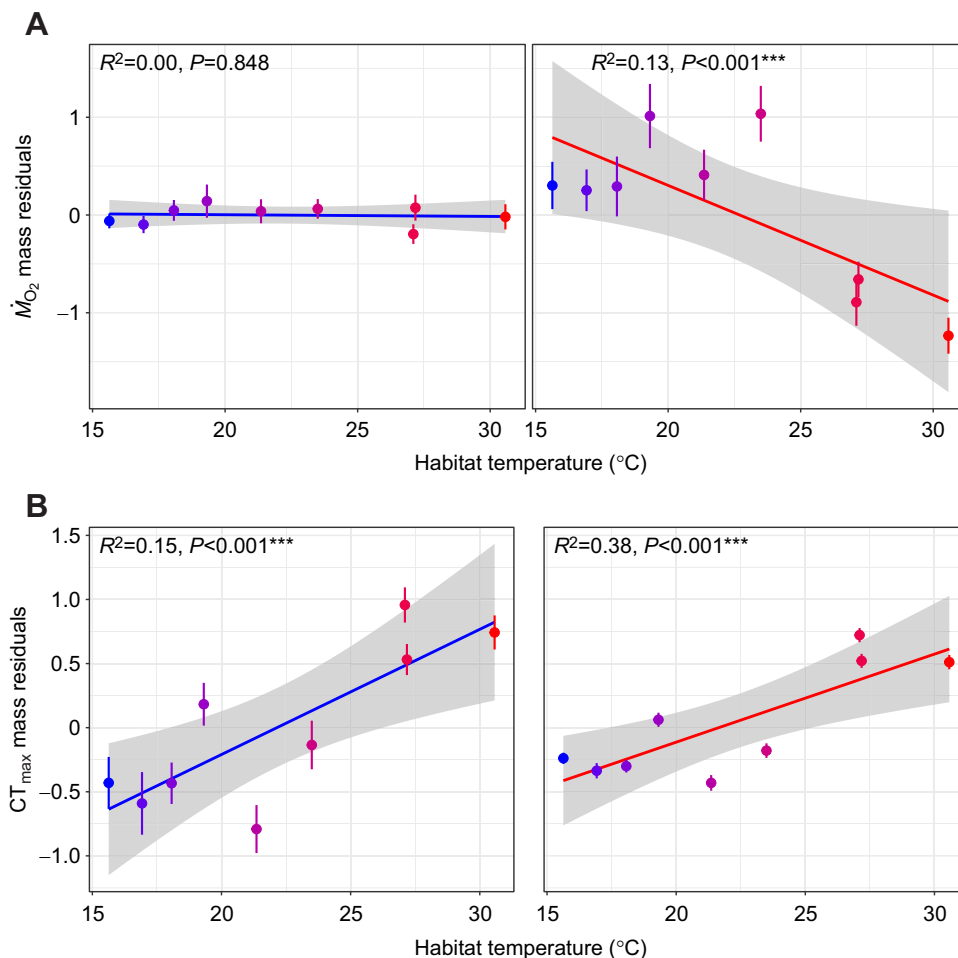

**Fig. 3. Habitat temperature significantly influences metabolic rate and thermal tolerance.** Mass residuals for (A) WAM (calculated as  $\dot{M}_{O_2}$ ) and (B)  $CT_{max}$  were used in a linear regression against habitat temperature for 12°C (blue line; left) and 28°C (red line; right). Points are colored according to habitat temperature as in Fig. 1 and represent means  $\pm$  s.e.m. Asterisks indicate significant  $P$ -values: \*\*\* $P<0.001$ .

(Fig. 3B). To rule out any possible interactions, an AIC best-fit model was run, incorporating acclimation temperature, acclimation order, sex, mass, habitat temperature and interactions. Comparable to WAM, while significant, the inclusion of these covariates and interactions did not alter our conclusions with respect to the effect of habitat temperature on  $CT_{max}$  (full best-fit model in Table S2, Fig. S2B). As for WAM, differences in acclimation order were more prominent at 12°C. Specifically,  $CT_{max}$  was lower in cooler populations (ME/MA) acclimated to 12°C first, but NJ populations were about the same regardless of acclimation order (Fig. S2B).

Given the difference between acclimation temperatures in terms of heart mass ( $P<0.001$ ), but not body mass ( $P=0.87$ ; Fig. S1), we examined CM variation using both heart and body mass residuals. With heart mass residuals, CM was significantly greater in fish from warmer habitats for glucose at both 12 and 28°C, LKA at 28°C, and FA and endogenous metabolism at 12°C (Fig. 4). However, with body mass residuals, these significant relationships were not present (Fig. S3). Finally, to investigate relationships among traits, we examined partial trait correlations within acclimation temperature. Interestingly, CM and WAM were not significantly correlated at either 12 or 28°C, except for endogenous metabolism at 28°C. In fact, among all of the physiological traits, there were few significant partial correlations at either 12 or 28°C, except among the CM substrates (Fig. 5). Additionally, correlations among CM were substrate and temperature dependent, such that FA metabolism was positively correlated with glucose and LKA metabolism at 28°C, but not at 12°C. In contrast glucose–LKA and LKA–endogenous CM were positively correlated at both temperatures.

### Inter- and intra-population variation in thermal sensitivity

Thermal sensitivity or  $Q_{10}$  (change in trait with every 10°C increase) for each individual could be determined for WAM and  $CT_{max}$  because they were measured and acclimated to both 12 and 28°C. For WAM, the high interindividual variation at both 12 and 28°C (Fig. 6A,B) produced a large range of  $Q_{10}$  (from 0.62 to 5.42). In contrast, for  $CT_{max}$ , nearly all the interindividual variation occurred at 12°C, with little variation at 28°C (Fig. 6A,C), resulting in a lower  $Q_{10}$  range for  $CT_{max}$  (1.06–1.20). Interestingly,  $Q_{10}$  values for both traits were significantly related to habitat temperature ( $P<0.05$ ; Fig. 6D,E), with colder populations having a greater  $Q_{10}$  than warmer populations. Furthermore, WAM and  $CT_{max}$  thermal sensitivity were negatively correlated ( $P=0.0018$ ), and thus individuals with higher WAM  $Q_{10}$  had lower  $CT_{max}$   $Q_{10}$  (Fig. S4). For CM, individuals were measured at either 12 or 28°C, and thus the mean  $Q_{10}$  value per population was calculated. As above, colder populations displayed a higher  $Q_{10}$  for most substrates; however, this was only significant for FA metabolism (Fig. 7). In contrast, colder populations had a significantly lower  $Q_{10}$  for LKA metabolism (Fig. 7).

### DISCUSSION

Temperature is an important factor affecting species distribution and ecological interactions (Deutsch et al., 2015, 2020; Pörtner, 2002, 2010; Somero, 2011; White et al., 2012). Particularly among ectothermic species, there is a consensus that metabolic rates are adaptively important and are driven by natural selection (Anderson and Gillooly, 2018; Clarke and Johnston, 1999; Peck and Conway, 2000). Fundamentally, metabolism has an optimum rate that organisms attempt to achieve by physiological acclimation,

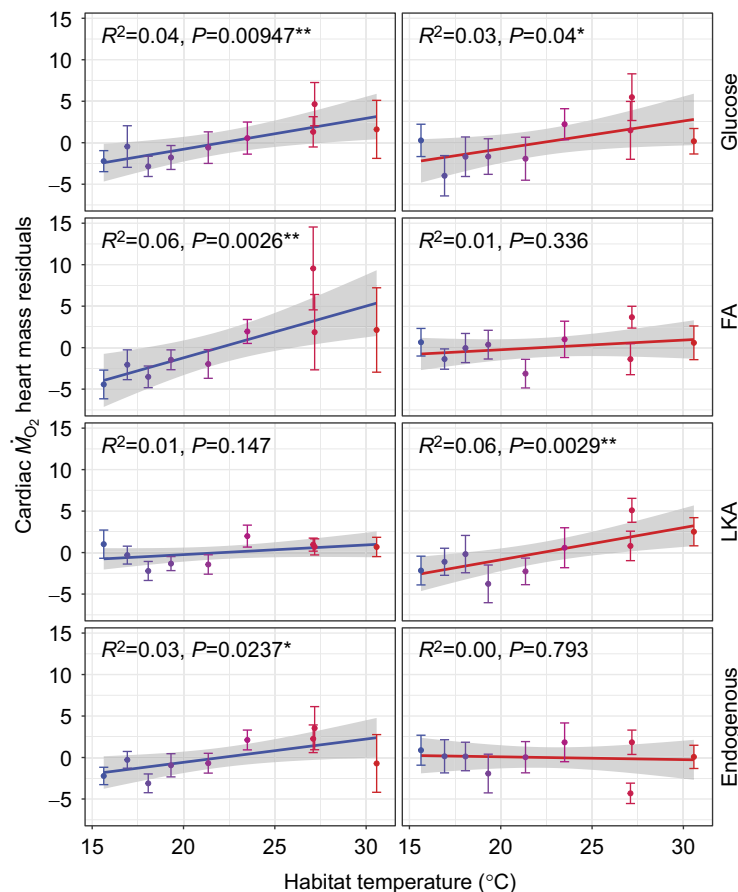

**Fig. 4. Habitat temperature significantly influences CM.** Heart mass residuals for CM (cardiac  $\dot{M}_{O_2}$ ) with the indicated substrates were used in a linear regression against habitat temperature for 12°C (blue line; left) and 28°C (red line; right). Points are colored according to habitat temperature as in Fig. 1 and represent means  $\pm$  s.e.m. Asterisks indicate significant  $P$ -values: \* $P<0.05$ , \*\* $P<0.01$ .

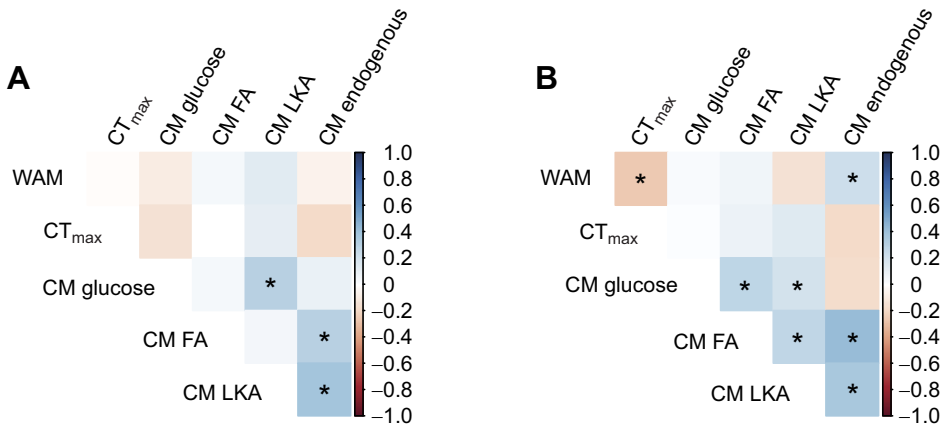

**Fig. 5. Partial trait correlations.** Mass residuals (WAM and CT<sub>max</sub>) or heart mass residuals (CM) from each trait were used to find partial correlations between each trait at (A) 12°C and (B) 28°C. Box color represents the correlation coefficient from 1.0 (blue) to -1.0 (red). Significance ( $\alpha=0.05$ ) is indicated by asterisks for each comparison.

evolutionary adaptation or both (Clarke, 2006; DeLong et al., 2018; White et al., 2012). Here, we focused on the concept that strong selection favors an optimum, and thus there will be a reduction in phenotypic variation leading to little interindividual variation.

### Trait variation in acclimation response

Acute higher temperatures increase physiological rates up to a maximum or pejus temperature, and then these processes quickly decline (Fig. 8, solid lines) (Pörtner, 2010). Acclimation or adaptation to different temperatures can shift this response and thus reduce temperature sensitivity (Fig. 8, solid blue to solid red line) (Pörtner, 2010; Schulte, 2015), yet rarely do either of these responses completely compensate for temperature differences (Fig. 8, solid blue to dashed red line). In this study, there was a

16°C difference in temperature, and the predicted acute  $Q_{10}$  of 2.0 would produce a 3.0-fold physiological difference.

Overall, our data demonstrate that the six physiological traits have widely different acclimation responses to temperature. On average, WAM showed little temperature acclimation compensation ( $Q_{10} \approx 2.0$ ) between the temperatures measured here, similar to previous observations in this species where  $Q_{10} \approx 2.0$  between similar temperatures (15 and 30°C; Healy and Schulte, 2012a). In contrast, CT<sub>max</sub> had much lower thermal sensitivity and greater acclimation compensation ( $Q_{10} \approx 1.1$ ) between acclimation/measurement temperatures of 12 and 28°C, as previously observed across a range of temperatures in this species, where average  $Q_{10}$  in a New Hampshire (northern) population ranged from  $\sim 1.0$  to 1.25 (Fangue et al., 2006). We expected a similar scaling of the

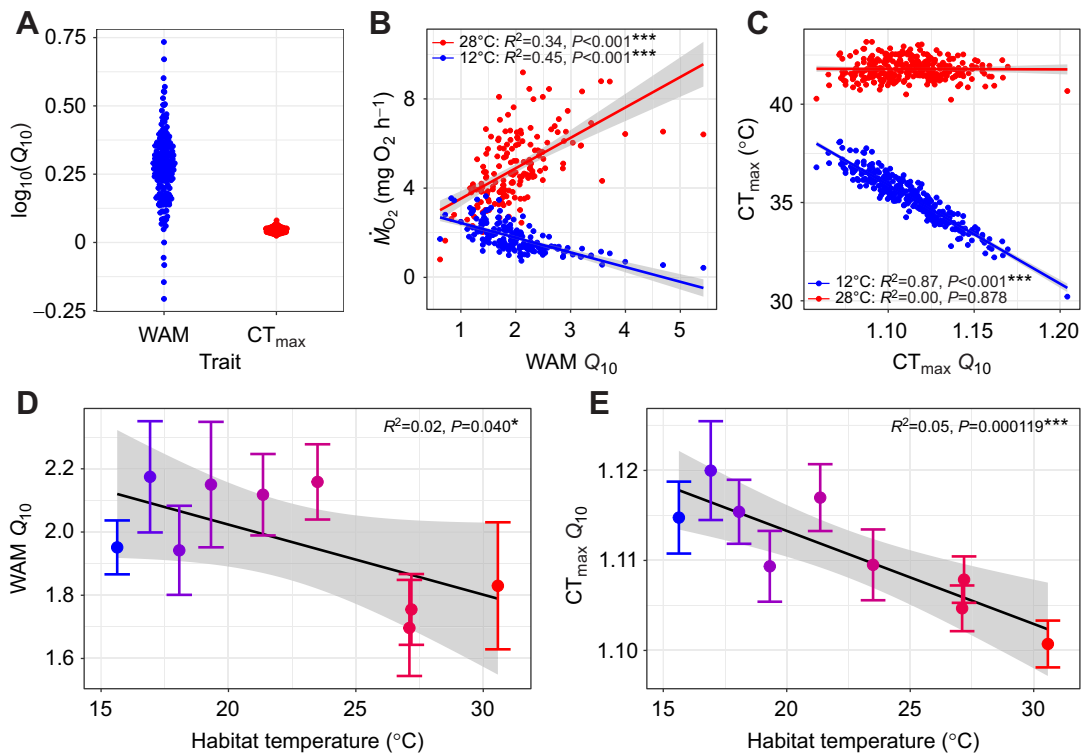

**Fig. 6. Thermal sensitivity in WAM and CT<sub>max</sub>.** (A) Distribution of mass-corrected  $\log_{10}(Q_{10})$  for WAM and CT<sub>max</sub>. (B,C) Thermal sensitivity measured as the  $Q_{10}$  for individuals acclimated and measured at 12 and 28°C, represented as a function of the raw trait value for (B) WAM and (C) CT<sub>max</sub>.  $Q_{10}$  was calculated using mass-corrected traits. The effect of the raw trait on  $Q_{10}$  was tested by linear regression. (D,E) Plasticity in the traits shows patterns according to habitat temperature for (D) WAM and (E) CT<sub>max</sub>. Mean  $\pm$  s.e.m.  $Q_{10}$  values are represented per population. Points are colored by habitat temperature as in Fig. 1. Asterisks indicate significant  $P$ -values: \* $P < 0.05$ , \*\*\* $P < 0.001$ .

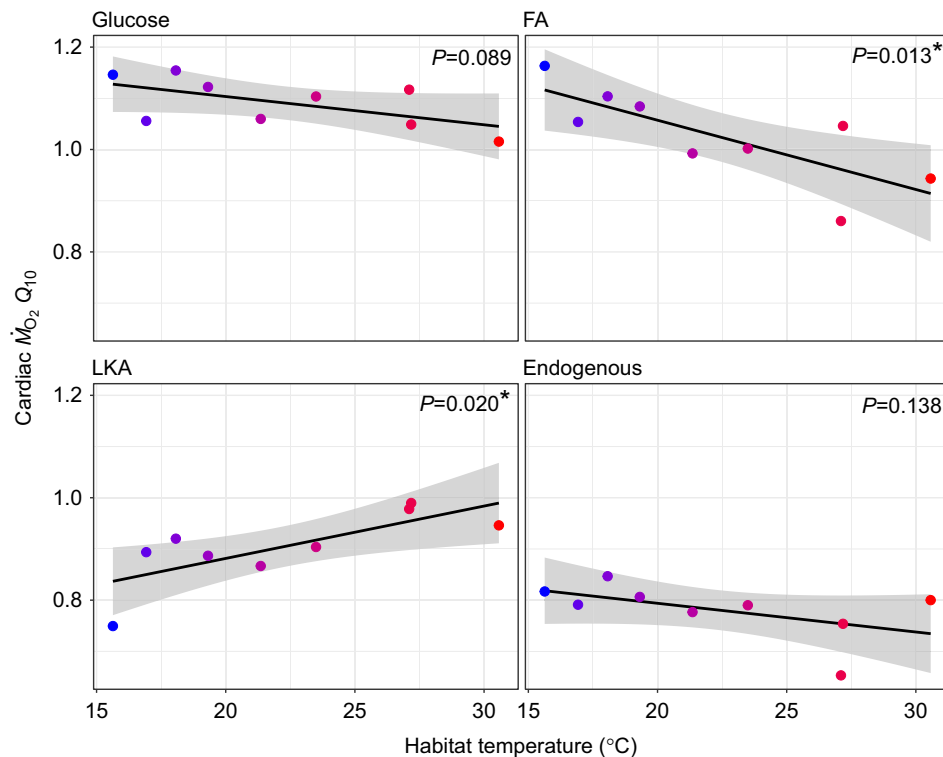

**Fig. 7. Thermal sensitivity in substrate-specific CM among populations.** As CM was only measured per individual at one temperature,  $Q_{10}$  was calculated using the mass-corrected mean metabolic rate per temperature, substrate and population.  $Q_{10}$  is plotted for each population as a function of habitat temperature. Points are colored by habitat temperature as in Fig. 1. Asterisks indicate significant  $P$ -values: \* $P < 0.05$ .

temperature response for all metabolic rates (WAM and CM), yet this was not the case. Despite high thermal sensitivity in WAM, CM showed surprisingly small or no thermal sensitivity, with  $Q_{10}$  ranging from 0.90 to 1.18, which also contrasts with maximum heart rate measurements in *F. heteroclitus* that differ quite widely when acclimated to 15°C versus 30°C (Safi et al., 2019).

The small or insignificant difference across 16°C in CM for FA, glucose and LKA suggests a total compensatory acclimation ( $Q_{10} \approx 1.0$ ) (Fig. 8). Endogenous CM was significantly higher at 12°C than at 28°C (Fig. 2) and thus the  $Q_{10}$  was less than one. Cardiac metabolic thermal sensitivity may reflect larger endogenous substrate stores at 12°C, which allows for a greater endogenous metabolism at lower temperatures, similar to what was previously observed across only NJ individuals (Drown et al., 2021). The observed larger heart mass at 12°C, resulting in greater endogenous metabolic stores, would support this supposition. An alternative explanation is that for CM, these individuals lie on either side of a thermal performance curve (Schulte et al., 2011); however, this is unlikely given 28°C is within the standard thermal range for this species, and no *F. heteroclitus* performance curves have a pejus temperature at or below 28°C (Baris et al., 2016b; Chung et al., 2017; Fanguie et al., 2008; Healy and Schulte, 2012a; Johnson and Bennett, 1995).

Conceptually, reduced temperature sensitivity with acclimation allows individuals to maintain a constant performance across a range of temperatures, providing an advantage compared with an acute temperature response. Acclimation may be accomplished by increasing enzyme concentrations at lower temperatures through mRNA regulation. For example, lactate dehydrogenase-B (LDH-B) and other proteins increase in concentration at lower temperatures through mRNA regulation (Segal and Crawford, 1994). Clearly, with a  $Q_{10}$  of  $\sim 1.0$ , CM is insensitive to temperature change, and thus physiological mechanisms eliminate the acute effect of temperature on biochemical reactions rates. These mechanisms are

missing for WAM, where the  $Q_{10}$  is  $\sim 2.0$ , suggesting that the need to integrate across physiological processes to define overall metabolic rate limits the ability to compensate for temperature changes. However, the interindividual variation we observed in WAM  $Q_{10}$  (as discussed below) suggests that, instead, there are biochemical and physiological mechanisms that readily shift the WAM thermal response, but these responses are highly variable, resulting in a mean  $Q_{10}$  of 2.0.

The small but statistically significant  $CT_{max}$  difference between acclimation temperatures reflects the relatively small variation among all individuals (Fig. 2B, Table 1). The thermal sensitivity in  $CT_{max}$  may depend on the specific acclimation temperature. The small difference among individuals acclimated to 12°C versus 28°C (16°C difference) could reflect a  $CT_{max}$  maximum limit or hard ceiling where both the variance and the mean plateau at an upper temperature (Morgan et al., 2020). Indeed, previous work in *F. heteroclitus* measuring  $CT_{max}$  at multiple acclimation temperatures (Fanguie et al., 2006) showed a plateau in  $CT_{max} \sim 42^\circ\text{C}$ , which is consistent with the average  $CT_{max}$  observed here (41.8°C). Acclimation to two closer temperatures ( $< 16^\circ\text{C}$  difference) may result in a similar difference in  $CT_{max}$  (i.e.  $\sim 6^\circ\text{C}$ ), but in turn a lower  $Q_{10}$ .

The benefit or direct fitness effect for lower  $CT_{max}$  at 12°C acclimation is not clear because of the highly variable marsh environment temperatures. For *F. heteroclitus*, marsh temperatures are likely to exceed 35°C (average  $CT_{max}$  at 12°C; Fig. 2B) and cold-acclimated individuals with a lower  $CT_{max}$  may have reduced fitness when subjected to these temperatures. While the thermal tolerance of marine species is an important ecological parameter for determining species range (Sunday et al., 2012), we suggest this reduction in  $CT_{max}$  with acclimation reflects acclimatory effects on other physiological processes. However, the lack of correlation among the traits measured (Fig. 5) suggests these effects may be more complex or tied to another trait not measured here.



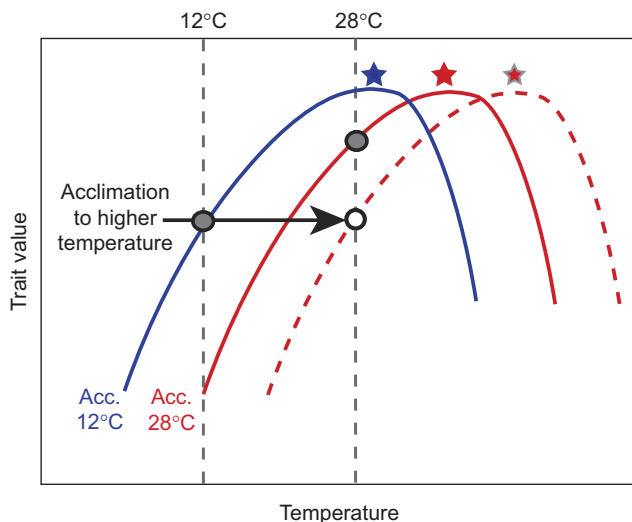

**Fig. 8. Acute versus acclimatory or evolved responses.** A modified thermal performance curve representing the acute effect of body temperature on a trait. Acclimation or adaptation shifts the curve to the right. Acclimation or adaptation to 28°C temperature will reduce (solid red line,  $Q_{10} < 2$ ) or eliminate temperature effects (dashed red line,  $Q_{10} \approx 1.0$ ), such that rates measured at 12 and 28°C are less than the acute effect (solid gray circle on solid red line) or the same at both temperatures (open gray circle on dashed red line). Stars denote maximum or pejus temperatures. Figure derived and modified from Fry and Hart (1948), Huey and Stevenson (1979), Izem and Kingsolver (2005), Kingsolver et al. (2004) and Schulte et al. (2011).

### Habitat temperature explains a significant amount of trait variation

In *F. heteroclitus*, metabolism and the underlying biochemical processes have evolved to counteract temperature effects (reviewed in Crawford et al., 2020). We measured multiple traits in the same individuals among populations inhabiting a mosaic of temperatures ranging from 15 to 32°C. We found that habitat temperature explained a significant amount of variation in several of these traits (Figs 3 and 4). For WAM, we observed higher metabolic rates in the colder populations when acclimated/measured at 28°C, yet no difference among populations from different habitat temperatures when acclimated/measured at 12°C, even when accounting for additional covariates (e.g. acclimation order; Fig. S2, Table S2). Previous studies examining metabolic rate in *F. heteroclitus* have been inconclusive. In New Hampshire (NH) and Georgia (GA) populations,  $\dot{M}_{O_2}$  was significantly greater in the colder populations at 5, 15 and 25°C (Fangue et al., 2009a). However, in acclimated routine  $\dot{M}_{O_2}$  measurements, differences between MA and GA populations were only observed at 5°C, across temperatures from 5 to 33°C (Healy and Schulte, 2012a). Furthermore,  $\dot{M}_{O_2}$  in NH, NJ and GA populations measured at 15°C showed significantly lower metabolic rate in GA, but no significant difference between NH and NJ (Brennan et al., 2018; Healy et al., 2019). In our study, the significant relationship between WAM and habitat temperature at 28°C (Fig. 3A) was mostly driven by the three most southern (NJ) populations. Overall, it appears that the impact of habitat temperature on metabolic rate is acclimation/measurement temperature specific. Metabolism may also be lower only in the NJ populations because of the historical divide and admixture zone associated with genetic isolation, including different mitochondrial haplotypes, similar to what has been observed with hypoxia

tolerance (Brennan et al., 2018; Crawford et al., 2020; Healy et al., 2018).

In contrast, across all nine populations,  $CT_{max}$  at both temperatures was significantly greater in warmer populations (Fig. 3B). This increase in  $CT_{max}$  in warmer habitats was observed even after long-term acclimation to two temperatures and thus is not due to reversible physiological acclimation. Therefore, it is most likely heritable, although we cannot rule out irreversible developmental or transgenerational effects (Cavieres et al., 2019). Thus, the variation in  $CT_{max}$  across habitats likely represents local adaptation. This supports previous work in *F. heteroclitus* where significant  $CT_{max}$  differences were observed both at the extremes of its range and between closely related populations (Dayan et al., 2015; Fangue et al., 2006; Healy et al., 2018). Yet, it is unclear why lower  $CT_{max}$  would be favored even at lower habitat temperatures. This may reflect a more derived state. Conversely,  $CT_{max}$  may have underlying physiological pathways involved in other processes where higher rates would be unfavorable.

CM (Fig. 4), unlike WAM, was lower at colder habitat temperatures depending on the substrate and acclimation temperature. These results are similar to heart mitochondrial respiration, where colder populations of *Fundulus* species have lower metabolism (Baris et al., 2016b, 2017). Based on the data presented here, this habitat temperature response is not due to the inability to modify CM as exemplified by the similar cardiac metabolic rate when acclimated and assayed at 12 and 28°C. That is, after acclimation, CM  $Q_{10}$  values are close to 1.0 and therefore show similar rates with a 16°C assay temperature difference; yet, there was a significant decrease with  $\sim 12^\circ\text{C}$  habitat temperature difference. Overall, these six traits show significant divergence among populations related to habitat temperature. These traits have been shown to be heritable (Crawford et al., 2020; Pörtner, 2012; Schulte, 2015), and it is likely that local adaptation is driving phenotypic shifts based upon temperature selection.

Additionally, while individuals were considered to be fully acclimated after both acclimation phases, we did observe an acclimation order effect on both WAM and  $CT_{max}$ , which was also previously observed in only NJ individuals (Drown et al., 2021). While this effect was significant, technical variation in acclimation order was corrected for using an AIC best-fit model for both  $CT_{max}$  and WAM, and habitat temperature remained a significant factor explaining trait variation for all but WAM at 12°C, which was also not previously significant (Fig. 3; Fig. S2).

### High variation within and among populations in thermal sensitivity

While local adaptation of physiological processes is common, especially in *F. heteroclitus* (Crawford et al., 2020), and the within-population variation in these specific physiological traits that we observed has been found in other independent studies (Healy and Schulte, 2012a; Healy et al., 2018; Oleksiak et al., 2005), our large dataset uniquely allowed us to examine variation in temperature response and thermal sensitivity within and among populations for a suite of metabolic and thermal tolerance traits.

To understand the variation in metabolic rates among individuals, we compared individual  $Q_{10}$  values for WAM from the individual data. Surprisingly,  $Q_{10}$  ranged from 0.62 to 5.42. Thus, some individuals had the same or lower WAM rates at 12 and 28°C, while others had a  $Q_{10}$  that exceeded the expected acute temperature effect (Fig. 6). This variation in  $Q_{10}$  is unexpected for two reasons. First, biological processes are expected to evolve to maintain homeostasis and, pertinent to this study, mitigate responses to environmental

temperature variation. Second, thermal sensitivity should be adaptive and natural selection for an optimum would reduce individual variation within a population. That is, selection for a specific trait should favor an allele or combination of alleles, thus reducing the frequency of the alternative allele, which would reduce heterozygosity or genetic variation and in turn the heritable trait variation. Yet, we found that some individuals had almost total compensation (nearly equal metabolic rates at 12 and 28°C,  $Q_{10} \approx 1.0$ ), while others had an almost 15-fold increase, yielding a  $Q_{10}$  of 5.4, greatly exceeding the expected  $Q_{10}$  of  $\sim 2.0$  in metabolism (Fig. 6A). We suggest that this variation among individuals represents different strategies for coping with environmental temperature variation. Some individuals may overcome the physical effect of temperature, while others exploit these higher temperatures.

Thermal sensitivity was significantly correlated with habitat temperature for many of the traits we measured, suggesting that it is both biologically relevant and adaptively important (Fig. 6D,E). The  $Q_{10}$  for both WAM and  $CT_{max}$  across habitat temperatures indicates lower sensitivity among populations from warmer habitats. For WAM, this pattern appears to be driven by the NJ population. While the ME and MA populations appear to have a similar  $Q_{10}$  values, those for the NJ population were much lower. As discussed above, the NJ populations are south of a historical evolutionary break, and this north–south historical isolation may be driving this pattern. In contrast, for  $CT_{max}$ , the pattern is more linear, supporting the idea that local habitat temperature is driving the  $Q_{10}$  response. CM, with the exception of that for LKA (Fig. 7), was lower at lower habitat temperatures depending on the substrate and acclimation temperature, unlike WAM, but similar to heart mitochondrial respiration, where colder populations of *Fundulus* species have lower metabolism (Baris et al., 2016a, 2017).

Overall, WAM and  $CT_{max}$  measurements at two acclimation and assay temperatures among the same individuals indicate large interindividual variation that results in a wide range of  $Q_{10}$  values. While only a small percentage of this variation can be explained by habitat temperature (Fig. 6D,E), patterns among populations suggest that the  $Q_{10}$  variation is biologically relevant. Yet, most of the  $Q_{10}$  variation is among individuals within a population. We suggest that individual variation in thermal sensitivity results in different physiological strategies in response to environmental temperature variation, which may promote the maintenance of standing genetic variation in a population (Burton et al., 2011; Careau et al., 2014; Norin et al., 2016). Furthermore, our findings regarding lower thermal sensitivity at higher temperatures support previous data suggesting individuals at lower latitudes have lower thermal sensitivity than higher latitude individuals (Seebacher et al., 2015).

Our data specifically represent thermal sensitivity between acclimation and measurement temperatures of 12 and 28°C, which leaves much of the *F. heteroclitus* thermal range unexplored in the current study. Thus, it is likely that variation in  $Q_{10}$  may depend on the temperature range being examined. For example, in the study by Healy and Schulte (2012a) of metabolic rate across a range of temperatures, thermal sensitivity was much more dependent on the temperatures being examined. Yet, Fangue et al. (2009b) found the thermal sensitivity of  $CT_{max}$  remained somewhat consistent ( $Q_{10} \approx 1.1$ ) across a 30°C temperature range. Lastly, repeated measurements in an individual for  $Q_{10}$  would provide insight as to whether this trait is repeatable, although given past repeatability of metabolic rate and  $CT_{max}$ , it is likely to be consistent (Drown et al., 2020; Healy and Schulte, 2012b; Morgan et al., 2018; Nespolo and Franco, 2007).

Global climate change will require species, populations and individuals to adjust to rapidly changing environments. If the physiological responses we measured are heritable, the data presented here on the individual variation in physiological traits and their  $Q_{10}$  values support a large standing genetic variation, particularly if individuals have different physiological strategies to cope with change. This breadth of standing genetic variation would enhance rapid evolution in physiological performance to compensate for global climate change (Matuszewski et al., 2015; Scheffers et al., 2016), providing some hope for species survival.

#### Acknowledgements

The authors would like to thank Liam Dorsey, Agatha Freedberg and Rebecca VanArnam for assistance with data collection and fish husbandry, and John Proefrock for comments on the manuscript.

#### Competing interests

The authors declare no competing or financial interests.

#### Author contributions

Conceptualization: A.N.D., M.F.O., D.L.C.; Methodology: A.N.D., M.K.D., M.A.E.; Validation: A.N.D.; Formal analysis: A.N.D.; Investigation: A.N.D., M.K.D., M.A.E.; Resources: M.F.O., D.L.C.; Data curation: A.N.D., M.K.D.; Writing - original draft: A.N.D.; Writing - review & editing: A.N.D., M.K.D., M.A.E., M.F.O., D.L.C.; Visualization: A.N.D.; Supervision: M.F.O., D.L.C.; Project administration: M.F.O., D.L.C.; Funding acquisition: M.F.O., D.L.C.

#### Funding

This research was funded by the National Science Foundation award numbers IOS 1556396 and IOS 1754437, awarded to M.F.O. and D.L.C.

#### Data availability

All data and scripts are available from the Dryad Digital Repository (DeLiberto et al., 2022): <https://doi.org/10.5061/dryad.z34tmgpg3>. Scripts used for analysis can also be found on GitHub: [https://github.com/ADeLiberto/Fundulus\\_Physiology](https://github.com/ADeLiberto/Fundulus_Physiology).

#### References

- Addo-Bediako, A., Chown, S. L. and Gaston, K. J. (2002). Metabolic cold adaptation in insects: a large-scale perspective. *Funct. Ecol.* **16**, 332-338. doi:10.1046/j.1365-2435.2002.00634.x
- Anderson, D. M. and Gillooly, J. F. (2018). Comparing the temperature dependence of mitochondrial respiration among vertebrates. *Evol. Ecol. Res.* **19**, 659-668.
- Baris, T. Z., Crawford, D. L. and Oleksiak, M. F. (2016a). Acclimation and acute temperature effects on population differences in oxidative phosphorylation. *Am. J. Physiol. Regul. Integr. Comp. Physiol.* **310**, R185-R196. doi:10.1152/ajpregu.00421.2015
- Baris, T. Z., Blier, P. U., Pichaud, N., Crawford, D. L. and Oleksiak, M. F. (2016b). Gene by environmental interactions affecting oxidative phosphorylation and thermal sensitivity. *Am. J. Physiol. Regul. Integr. Comp. Physiol.* **311**, R157-R165. doi:10.1152/ajpregu.00008.2016
- Baris, T. Z., Wagner, D. N., Dayan, D. I., Du, X., Blier, P. U., Pichaud, N., Oleksiak, M. F. and Crawford, D. L. (2017). Evolved genetic and phenotypic differences due to mitochondrial-nuclear interactions. *PLoS Genet.* **13**, e1006517. doi:10.1371/journal.pgen.1006517
- Brennan, R. S., Healy, T. M., Bryant, H. J., van La, M., Schulte, P. M. and Whitehead, A. (2018). Integrative population and physiological genomics reveals mechanisms of adaptation in killifish. *Mol. Biol. Evol.* **35**, 2639-2653. doi:10.1093/molbev/msy154
- Bulger, A. J. (1984). A daily rhythm in heat tolerance in the salt marsh fish *Fundulus heteroclitus*. *J. Exp. Zool.* **230**, 11-16. doi:10.1002/jez.1402300103
- Bulger, A. J. and Tremaine, S. C. (1985). Magnitude of seasonal effects on heat tolerance in *Fundulus heteroclitus*. *Physiol. Zool.* **58**, 197-204. doi:10.1086/physzool.58.2.30158567
- Bullock, T. H. (1955). Compensation for temperature in the metabolism and activity of poikilotherms. *Biol. Rev.* **30**, 311-342. doi:10.1111/j.1469-185X.1955.tb01211.x
- Burnett, K. G., Bain, L. J., Baldwin, W. S., Callard, G. V., Cohen, S., Di Giulio, R. T., Evans, D. H., Gómez-Chiarri, M., Hahn, M. E., Hoover, C. A. et al. (2007). *Fundulus* as the premier teleost model in environmental biology: opportunities for new insights using genomics. *Comp. Biochem. Physiol. D Genomics Proteomics* **2**, 257-286. doi:10.1016/j.cbd.2007.09.001

- Burton, T., Killen, S. S., Armstrong, J. D., Metcalfe, N. B. (2011). What causes intraspecific variation in resting metabolic rate and what are its ecological consequences? *Proc. Biol. Sci.* **278**, 3465-3473. doi:10.1098/rspb.2011.1778
- Butner, A. and Brattstrom, B. H. (1960). Local movement in *Mendia* and *Fundulus*. *Copeia* **2**, 139-141. doi:10.2307/1440210
- Careau, V., Gifford, M. E. and Biro, P. A. (2014). Individual (co)variation in thermal reaction norms of standard and maximal metabolic rates in wild-caught slimy salamanders. *Funct. Ecol.* **28**, 1175-1186. doi:10.1111/1365-2435.12259
- Cavieres, G., Alruiz, J. M., Medina, N. R., Bogdanovich, J. M. and Bozinovic, F. (2019). Transgenerational and within-generation plasticity shape thermal performance curves. *Ecol. Evol.* **9**, 2072-2082. doi:10.1002/ece3.4900
- Chown, S. L., Hoffmann, A. A., Kristensen, T. N., Angilletta, M. J., Stenseth, N. C. and Pertoldi, C. (2010). Adapting to climate change: a perspective from evolutionary physiology. *Clim. Res.* **43**, 3-15. doi:10.3354/cr00879
- Chung, D. J., Bryant, H. J. and Schulte, P. M. (2017). Thermal acclimation and subspecies-specific effects on heart and brain mitochondrial performance in a eurythermal teleost (*Fundulus heteroclitus*). *J. Exp. Biol.* **220**, 1459-1471. doi:10.1242/jeb.151217
- Clarke, A. (2006). Temperature and the metabolic theory of ecology. *Funct. Ecol.* **20**, 405-412. doi:10.1111/j.1365-2435.2006.01109.x
- Clarke, A. and Johnston, N. M. (1999). Scaling of metabolic rate with body mass and temperature in teleost fish. *J. Anim. Ecol.* **68**, 893-905. doi:10.1046/j.1365-2656.1999.00337.x
- Conover, D. O. and Present, T. M. C. (1990). Countergradient variation in growth rate: compensation for length of the growing season among Atlantic silversides from different latitudes. *Oecologia* **83**, 316-324. doi:10.1007/BF00317554
- Conover, D. O. and Schultz, E. T. (1995). Phenotypic similarity and the evolutionary significance of countergradient variation. *Trends Ecol. Evol.* **10**, 248-252. doi:10.1016/S0169-5347(00)89081-3
- Crawford, D. L. and Powers, D. A. (1989). Molecular basis of evolutionary adaptation at the lactate dehydrogenase-B locus in the fish *Fundulus heteroclitus*. *Proc. Natl. Acad. Sci. USA* **86**, 9365-9369. doi:10.1073/pnas.86.23.9365
- Crawford, D. L., Schulte, P. M., Whitehead, A. and Oleksiak, M. F. (2020). Evolutionary physiology and genomics in the highly adaptable killifish (*Fundulus heteroclitus*). *Compr. Physiol.* **10**, 637-671. doi:10.1002/cphy.c190004
- Dayan, D. I., Crawford, D. L. and Oleksiak, M. F. (2015). Phenotypic plasticity in gene expression contributes to divergence of locally adapted populations of *Fundulus heteroclitus*. *Mol. Ecol.* **24**, 3345-3359. doi:10.1111/mec.13188
- DeLiberto, A. N., Drown, M. K., Oleksiak, M. F. and Crawford, D. L. (2020). Measuring complex phenotypes: a flexible high-throughput design for micro-respirometry. *bioRxiv*. doi:10.1101/2020.03.16.993550
- DeLiberto, A., Drown, M., Ehrlich, M., Oleksiak, M. and Crawford, D. (2022). To rise to temperature: Variation in temperature effects within and among populations. Dryad, Dataset. <https://doi.org/10.5061/dryad.z34mpgg3>
- DeLong, J. P., Bachman, G., Gibert, J. P., Luhning, T. M., Montooth, K. L., Neyer, A. and Reed, B. (2018). Habitat, latitude and body mass influence the temperature dependence of metabolic rate. *Biol. Lett.* **14**. doi:10.1098/rsbl.2018.0442
- Deutsch, C., Ferrel, A., Seibel, B., Pörtner, H.-O. and Huey, R. B. (2015). Climate change tightens a metabolic constraint on marine habitats. *Science* **348**, 1132-1135. doi:10.1126/science.aaa1605
- Deutsch, C., Penn, J. L. and Seibel, B. (2020). Metabolic trait diversity shapes marine biogeography. *Nature* **585**, 557-562. doi:10.1038/s41586-020-2721-y
- Drown, M. K., DeLiberto, A. N., Crawford, D. L. and Oleksiak, M. F. (2020). An innovative setup for high-throughput respirometry of small aquatic animals. *Front. Mar. Sci.* **7**, 581104. doi:10.3389/fmars.2020.581104
- Drown, M. K., Deliberto, A. N., Ehrlich, M. A., Crawford, D. L. and Oleksiak, M. F. (2021). Interindividual plasticity in metabolic and thermal tolerance traits from populations subjected to recent anthropogenic heating. *R. Soc. Open Sci.* **8**, 2021. doi:10.1098/rsos.210440
- Eanes, W. F. (1999). Analysis of selection on enzyme polymorphisms. *Annu. Rev. Ecol. Syst.* **30**, 301-326. doi:10.1146/annurev.ecolsys.30.1.301
- Fangue, N. A., Hofmeister, M. and Schulte, P. M. (2006). Intraspecific variation in thermal tolerance and heat shock protein gene expression in common killifish, *Fundulus heteroclitus*. *J. Exp. Biol.* **209**, 2859-2872. doi:10.1242/jeb.02260
- Fangue, N. A., Mandic, M., Richards, J. G. and Schulte, P. M. (2008). Swimming performance and energetics as a function of temperature in killifish *Fundulus heteroclitus*. *Physiol. Biochem. Zool.* **81**, 389-401. doi:10.1086/589109
- Fangue, N. A., Richards, J. G. and Schulte, P. M. (2009a). Do mitochondrial properties explain intraspecific variation in thermal tolerance? *J. Exp. Biol.* **212**, 514-522. doi:10.1242/jeb.024034
- Fangue, N. A., Podrabsky, J. E., Crawshaw, L. I. and Schulte, P. M. (2009b). Countergradient variation in temperature preference in populations of killifish *Fundulus heteroclitus*. *Physiol. Biochem. Zool.* **82**, 776-786. doi:10.1086/606030
- Fry, F. E. J. and Hart, J. S. (1948). The relation of temperature to oxygen consumption in the goldfish. *Biol. Bull.* **94**, 66-77. doi:10.2307/1538211
- Gerken, A. R., Eller, O. C., Hahn, D. A. and Morgan, T. J. (2015). Constraints, independence, and evolution of thermal plasticity: Probing genetic architecture of long- and short-term thermal acclimation. *Proc. Natl. Acad. Sci. USA* **112**, 4399-4404. doi:10.1073/pnas.1503456112
- Graves, J. E. and Somero, G. N. (1982). Electrophoretic and functional enzymic evolution in four species of Eastern Pacific barracudas from different thermal environments. *Evolution* **36**, 97. doi:10.2307/2407971
- Havird, J. C., Neuwald, J. L., Shah, A. A., Mauro, A., Marshall, C. A. and Ghalambor, C. K. (2020). Distinguishing between active plasticity due to thermal acclimation and passive plasticity due to  $Q_{10}$  effects: Why methodology matters. *Funct. Ecol.* **34**, 1015-1028. doi:10.1111/1365-2435.13534
- Healy, T. M. and Schulte, P. M. (2012a). Thermal acclimation is not necessary to maintain a wide thermal breadth of aerobic scope in the common killifish (*Fundulus heteroclitus*). *Physiol. Biochem. Zool.* **85**, 107-119. doi:10.1086/664584
- Healy, T. M. and Schulte, P. M. (2012b). Factors affecting plasticity in whole-organism thermal tolerance in common killifish (*Fundulus heteroclitus*). *J. Comp. Physiol. B Biochem. Syst. Environ. Physiol.* **182**, 49-62. doi:10.1007/s00360-011-0595-x
- Healy, T. M. and Schulte, P. M. (2019). Patterns of alternative splicing in response to cold acclimation in fish. *J. Exp. Biol.* **222**. jeb193516. doi:10.1242/jeb.193516
- Healy, T. M., Brennan, R. S., Whitehead, A. and Schulte, P. M. (2018). Tolerance traits related to climate change resilience are independent and polygenic. *Glob. Chang. Biol.* **24**, 5348-5360. doi:10.1111/gcb.14386
- Healy, T. M., Brennan, R. S., Whitehead, A. and Schulte, P. M. (2019). Mitochondria, sex and variation in routine metabolic rate. *Mol. Ecol.* **28**, 4608-4619. doi:10.1111/mec.15244
- Hochachka, P. W. and Somero, G. N. (2002). *Biochemical Adaptation, Mechanism and Process in Physiological Evolution*. New York: Oxford University Press.
- Huey, R. B. and Stevenson, R. D. (1979). Integrating thermal physiology and ecology of ectotherms: a discussion of approaches. *Integr. Comp. Biol.* **19**, 357-366. doi:10.1093/icb/19.1.357
- Hurvich, C. M., Simonoff, J. S. and Tsai, C.-L. (1998). Smoothing parameter selection in nonparametric regression using an improved Akaike information criterion. *J. R. Stat. Soc. Ser. B Stat. Methodol.* **60**, 271-293. doi:10.1111/1467-9868.00125
- Izem, R. and Kingsolver, J. G. (2005). Variation in continuous reaction norms: quantifying directions of biological interest. *Am. Nat.* **166**, 289. doi:10.1086/431314
- Johnson, T. and Bennett, A. (1995). The thermal acclimation of burst escape performance in fish: an integrated study of molecular and cellular physiology and organismal performance. *J. Exp. Biol.* **198**, 2165-2175. doi:10.1242/jeb.198.10.2165
- Kingsolver, J. G., Izem, R. and Ragland, G. J. (2004). Plasticity of size and growth in fluctuating thermal environments: comparing reaction norms and performance curves. *Integr. Comp. Biol.* **44**, 450-460. doi:10.1093/icb/44.6.450
- Klein, M. G. and Prosser, C. L. (1985). The effects of temperature acclimation on the resting membrane of skeletal muscle fibres from green sunfish. *J. Exp. Biol.* **114**, 563-579. doi:10.1242/jeb.114.1.563
- Leiva, F. P., Garcés, C., Verberk, W. C. E. P., Care, M., Paschke, K. and Gebauer, P. (2018). Differences in the respiratory response to temperature and hypoxia across four life-stages of the intertidal porcelain crab *Petrolisthes laevigatus*. *Mar. Biol.* **165**, 146. doi:10.1007/s00227-018-3406-z
- Leroi, A. M., Bennett, A. F. and Lenski, R. E. (1994). Temperature acclimation and competitive fitness: an experimental test of the beneficial acclimation assumption. *Proc. Natl. Acad. Sci. USA* **91**, 1917-1921. doi:10.1073/pnas.91.5.1917
- Matuszewski, S., Hermisson, J. and Kopp, M. (2015). Catch me if you can: adaptation from standing genetic variation to a moving phenotypic optimum. *Genetics* **200**, 1255-1274. doi:10.1534/genetics.115.178574
- Morgan, R., Finnøen, M. H. and Jutfelt, F. (2018). CTmax is repeatable and doesn't reduce growth in zebrafish. *Sci. Rep.* **8**, 7099. doi:10.1038/s41598-018-25593-4
- Morgan, R., Finnøen, M. H., Jensen, H., Pélabon, C. and Jutfelt, F. (2020). Low potential for evolutionary rescue from climate change in a tropical fish. *Proc. Natl. Acad. Sci. USA* **117**, 33365-33372. doi:10.1073/pnas.2011419117
- Nespolo, R. F. and Franco, M. (2007). Whole-animal metabolic rate is a repeatable trait: a meta-analysis. *J. Exp. Biol.* **210**, 2000-2005. doi:10.1242/jeb.02780
- Nespolo, R. F., Lardies, M. A. and Bozinovic, F. (2003). Intrapopulation variation in the standard metabolic rate of insects: Repeatability, thermal dependence and sensitivity ( $Q_{10}$ ) of oxygen consumption in a cricket. *J. Exp. Biol.* **206**, 4309-4315. doi:10.1242/jeb.00687
- Norin, T., Malte, H. and Clark, T. D. (2016). Differential plasticity of metabolic rate phenotypes in a tropical fish facing environmental change. *Funct. Ecol.* **30**, 369-378. doi:10.1111/1365-2435.12503
- Oleksiak, M. F., Roach, J. L. and Crawford, D. L. (2005). Natural variation in cardiac metabolism and gene expression in *Fundulus heteroclitus*. *Nat. Genet.* **37**, 67-72. doi:10.1038/ng1483
- Peck, L. S. and Conway, L. Z. (2000). The myth of metabolic cold adaptation: oxygen consumption in stenothermal Antarctic bivalves. *Geol. Soc. Lond. Spec. Publ.* **177**, 441-450. doi:10.1144/GSL.SP.2000.177.01.29

- Pierce, V. A. and Crawford, D. L.** (1997a). Phylogenetic analysis of thermal acclimation of the glycolytic enzymes in the genus *Fundulus*. *Physiol. Zool.* **70**, 597-609. doi:10.1086/515879
- Pierce, V. A. and Crawford, D. L.** (1997b). Phylogenetic analysis of glycolytic enzyme expression. *Science* **276**, 256-259. doi:10.1126/science.276.5310.256
- Podrabsky, J. E., Javillonar, C., Hand, S. C. and Crawford, D. L.** (2000). Intraspecific variation in aerobic metabolism and glycolytic enzyme expression in heart ventricles. *Am. J. Physiol. Regul. Integr. Comp. Physiol.* **279**, R2344-R2348. doi:10.1152/ajpregu.2000.279.6.R2344
- Pörtner, H.-O.** (2002). Climate variations and the physiological basis of temperature dependent biogeography: Systemic to molecular hierarchy of thermal tolerance in animals. *Comp. Biochem. Physiol. A Mol. Integr. Physiol.* **132**, 739-761. doi:10.1016/S1095-6433(02)00045-4
- Pörtner, H.-O.** (2010). Oxygen- and capacity-limitation of thermal tolerance: a matrix for integrating climate-related stressor effects in marine ecosystems. *J. Exp. Biol.* **213**, 881-893. doi:10.1242/jeb.037523
- Pörtner, H.-O.** (2012). Integrating climate-related stressor effects on marine organisms: unifying principles linking molecule to ecosystem-level changes. *Mar. Ecol. Prog. Ser.* **470**, 273-290. doi:10.3354/meps10123
- Pörtner, H. O. and Farrell, A. P.** (2008). Ecology: physiology and climate change. *Science* **322**, 690-692. doi:10.1126/science.1163156
- Powers, D. A., Smith, M., Gonzalez-Villasenor, I., DiMichele, L., Crawford, D., Bernardi, G. and Lauerman, T.** (1993). A multidisciplinary approach to the selectionist/neutralist controversy using the model teleost *Fundulus heteroclitus*. In *Oxford Surveys in Evolutionary Biology*, Vol. 9 (ed. D. Futuyma and J. Antonovics), pp. 43-108. New York: Oxford University Press.
- Safi, H., Zhang, Y., Schulte, P. M. and Farrell, A. P.** (2019). The effect of acute warming and thermal acclimation on maximum heart rate of the common killifish *Fundulus heteroclitus*. *J. Fish Biol.* **95**, 1441-1446. doi:10.1111/jfb.14159
- Scheffers, B. R., De Meester, L., Bridge, T. C. L., Hoffmann, A. A., Pandolfi, J. M., Corlett, R. T., Butchart, S. H. M., Pearce-Kelly, P., Kovacs, K. M., Dudgeon, D. et al.** (2016). The broad footprint of climate change from genes to biomes to people. *Science* **354**, 10.1126/science.aaf7671. doi:10.1126/science.aaf7671
- Schulte, P. M.** (2015). The effects of temperature on aerobic metabolism: Towards a mechanistic understanding of the responses of ectotherms to a changing environment. *J. Exp. Biol.* **218**, 1856-1866. doi:10.1242/jeb.118851
- Schulte, P. M., Healy, T. M. and Fanguie, N. A.** (2011). Thermal performance curves, phenotypic plasticity, and the time scales of temperature exposure. *Integr. Comp. Biol.* **51**, 691-702. doi:10.1093/icb/ict097
- Seebacher, F., White, C. R. and Franklin, C. E.** (2015). Physiological plasticity increases resilience of ectothermic animals to climate change. *Nat. Clim. Chang.* **5**, 61-66. doi:10.1038/nclimate2457
- Segal, J. A. and Crawford, D. L.** (1994). LDH-B enzyme expression: the mechanisms of altered gene expression in acclimation and evolutionary adaptation. *Am. J. Physiol. Regul. Integr. Comp. Physiol.* **267**, R1150-R1153. doi:10.1152/ajpregu.1994.267.4.R1150
- Smith, K. J. and Able, K. W.** (2003). Dissolved oxygen dynamics in salt marsh pools and its potential impacts on fish assemblages. *Mar. Ecol. Prog. Ser.* **258**, 223-232. doi:10.3354/meps258223
- Sokolova, I. M. and Pörtner, H.-O.** (2003). Metabolic plasticity and critical temperatures for aerobic scope in a eurythermal marine invertebrate (*Littorina saxatilis*, Gastropoda: Littorinidae) from different latitudes. *J. Exp. Biol.* **206**, 195-207. doi:10.1242/jeb.00054
- Somero, G. N.** (1978). Temperature adaptation of enzymes: biological optimization through structure-function compromises. *Annu. Rev. Ecol. Syst.* **9**, 1-29. doi:10.1146/annurev.es.09.110178.000245
- Somero, G. N.** (1995). Proteins and temperature. *Annu. Rev. Physiol.* **57**, 43-68. doi:10.1146/annurev.ph.57.030195.000355
- Somero, G. N.** (2011). Comparative physiology: a "crystal ball" for predicting consequences of global change. *Am. J. Physiol. Regul. Integr. Comp. Physiol.* **301**, R1-R14. doi:10.1152/ajpregu.00719.2010
- Somero, G. N.** (2012). The physiology of global change: linking patterns to mechanisms. *Annu. Rev. Mar. Sci.* **4**, 39-61. doi:10.1146/annurev-marine-120710-100935
- Sunday, J. M., Bates, A. E. and Dulvy, N. K.** (2012). Thermal tolerance and the global redistribution of animals. *Nat. Clim. Chang.* **2**, 686-690. doi:10.1038/nclimate1539
- White, C. R., Alton, L. A. and Frappell, P. B.** (2012). Metabolic cold adaptation in fishes occurs at the level of whole animal, mitochondria and enzyme. *Proc. R. Soc. B Biol. Sci.* **279**, 1740-1747. doi:10.1098/rspb.2011.2060
